# Supplementary material
Source: HighWire-hosted journal article supplement (https://www.cmajopen.ca/highwire/filestream/88759/field_highwire_adjunct_files/1/open-2021-0257-2-at.pdf)
Supplement: open-2021-0257-2-at.pdf [file open-2021-0257-2-at.pdf]

Appendix 2. Diagnostic codes used to identify infections targeted by provincial clinical guides.

| <b>Infection</b>                                                  | <b>ICD-9 diagnostic codes</b>                                                                                                                                                                                  |
|-------------------------------------------------------------------|----------------------------------------------------------------------------------------------------------------------------------------------------------------------------------------------------------------|
| Bronchitis and chronic obstructive pulmonary disease exacerbation | 466 466.0 466.1 466.2 466.3 466.4 466.6 466.7 466.9<br>490 490.0 490.1 490.2 490.6 490.9                                                                                                                       |
| Otitis media                                                      | 382 382.0 382.1 382.2 382.3 382.4 382.7 382.9                                                                                                                                                                  |
| Pharyngitis                                                       | 340 341<br>462 462.0 462.1 462.4 462.9<br>463 463.0 463.2 463.8 463.9                                                                                                                                          |
| Pneumonia                                                         | 481 481.0 481.1 481.9<br>482 482.9<br>485 485.0 485.9<br>486 486.0 486.4 486.5 486.9                                                                                                                           |
| Sinusitis                                                         | 461 461.0 461.1 461.2 461.3 461.4 461.5 461.6 461.8 461.9                                                                                                                                                      |
| Upper respiratory tract infection                                 | Acute laryngitis and tracheitis : 464 464.4 464.9 464.0 464.1 464.2 464.7<br>Acute upper respiratory infections of multiple or unspecified sites:<br>465 465.0 465.1 465.2 465.3 465.4 465.5 465.6 465.8 465.9 |
